# Supplementary material for: Antioxidant Activity and Multi-Elemental Analysis of Dark Chocolate
Source: MDPI journal article supplement (doi:10.3390/foods11101445), 2022-05-17
Supplement: s1 [file s1]

## Supplementary Materials

**Table S1.** Producers and nutrition information (per 100 g) of analyzed chocolate samples

| Sample* | Brand                         | Energy value<br>(cal) | Fat<br>(g) | Carbohydrate<br>(g) | Protein<br>(g) |
|---------|-------------------------------|-----------------------|------------|---------------------|----------------|
| S1      | Lindt & Sprüngli, Switzerland | 475                   | 32         | 60                  | 5              |
| S2      | Maxi Premia, Serbia           | 528                   | 31.8       | 51.1                | 4.9            |
| S3      | Roshen, Ukraine               | 547                   | 36.2       | 45.1                | 5.8            |
| S4      | Hachez, Germany               | 578                   | 47         | 23                  | 8.8            |
| S5      | Soko-Štark d.o.o., Serbia     | 552                   | 40         | 33                  | 10             |
| S6      | Soko-Štark d.o.o., Serbia     | 519                   | 34         | 39                  | 8.3            |
| S7      | Soko-Štark d.o.o., Serbia     | 540                   | 38         | 35                  | 9.5            |
| S8      | Hachez, Germany               | 565                   | 45         | 24                  | 8              |
| S9      | Hachez, Germany               | 570                   | 46         | 25                  | 9              |
| S10     | Valor Chocolates S.A., Spain  | 568                   | 49         | 19                  | 11             |
| S11     | Hachez, Germany               | 648                   | 58         | 15                  | 10             |
| S12     | Lindt & Sprüngli, Switzerland | 573                   | 49         | 10                  | 14             |

\* S1 (40% cocoa with the addition of dried chili pepper), S2 (49% cocoa), S3 (56% cocoa), S4 (73% cocoa), S5 (75% cocoa), S6 (75% cocoa with addition of dried orange), S7 (75% cocoa with addition of dried raspberry), S8 (77% cocoa), S9 (77% cocoa with addition of orange), S10 (85% cocoa, gluten-free, no sugar added), S11 (88% cocoa), S12 (99% cocoa).

**Table S2.** Method parameters.

| View Direction     | Radial | Axial |
|--------------------|--------|-------|
| UV Exposure time   | 15     | 15    |
| UV RF Power        | 1150   | 1150  |
| UV Neb Gas Flow    | 0.5    | 0.5   |
| VIS Exposure Time  | 5      | 5     |
| VIS RF Power       | 1150   | 1150  |
| VIS Neb Gas Flow   | 0.5    | 0.5   |
| Cool Gas Flow Rate | 12     | 12    |
| Aux Gas Flow Rate  | 0.5    | 0.5   |

**Table S3.** Method detection limits (MDL) and method quantification limits (MQL) for elements

|    | MQL (mg/kg) | MDL (mg/kg) |
|----|-------------|-------------|
| Sb | 0.224       | 0.067       |
| As | 0.580       | 0.174       |
| Cd | 0.032       | 0.010       |
| Co | 0.420       | 0.126       |
| Ni | 0.126       | 0.038       |
| Se | 0.448       | 0.134       |
| Tl | 0.364       | 0.109       |
| V  | 0.182       | 0.055       |
| Al | 0.559       | 0.168       |
| Ba | 0.014       | 0.004       |
| B  | 0.308       | 0.092       |
| Ca | 0.699       | 0.210       |
| Cr | 0.112       | 0.034       |
| Fe | 0.210       | 0.063       |
| Pb | 1.483       | 0.445       |
| Cu | 0.448       | 0.134       |

|    |        |        |
|----|--------|--------|
| Mg | 0.056  | 0.017  |
| Mn | 0.014  | 0.004  |
| Si | 0.280  | 0.084  |
| Sr | 0.014  | 0.004  |
| Ti | 0.070  | 0.021  |
| Zn | 0.406  | 0.122  |
| S  | 4.895  | 1.470  |
| Mo | 0.117  | 0.035  |
| Na | 3.636  | 1.092  |
| K  | 98.643 | 29.623 |

**Table S4.** Parameters of descriptive statistics for elemental profile of chocolate with different cocoa content

| Sample |          | Al    | Ba   | Ca     | Cd   | Co   | Cr   | Cu   | Fe     | K       | Mg     | Mn    | Ni   | S       | Si    | Sr   | Ti    | Zn    |
|--------|----------|-------|------|--------|------|------|------|------|--------|---------|--------|-------|------|---------|-------|------|-------|-------|
| S1     | Mean     | 20.54 | 2.11 | 491.86 | 0.03 | 0.36 | 0.91 | 7.73 | 224.85 | 1153.80 | 904.54 | 11.28 | 2.43 | 1249.28 | 3.17  | 3.70 | 0.96  | 13.39 |
|        | St. Dev. | 1.33  | 0.05 | 2.67   | 0.00 | 0.00 | 0.01 | 0.02 | 1.93   | 4.53    | 2.11   | 0.09  | 0.00 | 4.00    | 0.05  | 0.02 | 0.06  | 0.35  |
|        | Min      | 19.31 | 2.06 | 489.76 | 0.03 | 0.36 | 0.90 | 7.72 | 223.18 | 1149.52 | 902.25 | 11.19 | 2.43 | 1245.36 | 3.11  | 3.69 | 0.90  | 13.12 |
|        | Max      | 21.95 | 2.14 | 494.87 | 0.03 | 0.36 | 0.92 | 7.75 | 226.97 | 1158.54 | 906.41 | 11.37 | 2.43 | 1253.36 | 3.22  | 3.72 | 1.01  | 13.79 |
|        | Median   | 20.35 | 2.14 | 490.95 | 0.03 | 0.36 | 0.90 | 7.73 | 224.40 | 1153.33 | 904.95 | 11.28 | 2.43 | 1249.11 | 3.18  | 3.70 | 0.97  | 13.26 |
|        | RSD      | 6.45  | 2.19 | 0.54   | 0.00 | 0.05 | 1.56 | 0.20 | 0.86   | 0.39    | 0.23   | 0.80  | 0.00 | 0.32    | 1.64  | 0.52 | 6.14  | 2.63  |
| S2     | Mean     | 12.00 | 1.69 | 337.66 | 0.03 | 0.19 | 0.86 | 6.85 | 110.94 | 694.75  | 663.48 | 7.58  | 1.92 | 1058.68 | 1.62  | 3.74 | 0.23  | 12.15 |
|        | St. Dev. | 0.65  | 0.06 | 1.26   | 0.00 | 0.01 | 0.01 | 0.02 | 1.00   | 4.65    | 2.07   | 0.10  | 0.01 | 4.50    | 0.03  | 0.03 | 0.04  | 0.25  |
|        | Min      | 11.35 | 1.62 | 336.46 | 0.03 | 0.18 | 0.86 | 6.83 | 109.95 | 689.87  | 661.21 | 7.51  | 1.92 | 1054.25 | 1.59  | 3.71 | 0.19  | 11.95 |
|        | Max      | 12.65 | 1.73 | 338.97 | 0.03 | 0.20 | 0.88 | 6.87 | 111.94 | 699.12  | 665.27 | 7.69  | 1.93 | 1063.25 | 1.65  | 3.77 | 0.27  | 12.43 |
|        | Median   | 12.02 | 1.73 | 337.56 | 0.03 | 0.18 | 0.86 | 6.87 | 110.92 | 695.25  | 663.96 | 7.52  | 1.92 | 1058.55 | 1.62  | 3.73 | 0.22  | 12.08 |
|        | RSD      | 5.41  | 3.80 | 0.37   | 0.00 | 6.13 | 1.14 | 0.36 | 0.90   | 0.67    | 0.31   | 1.34  | 0.32 | 0.43    | 1.89  | 0.84 | 19.20 | 2.02  |
| S3     | Mean     | 11.38 | 1.99 | 356.14 | 0.03 | 0.20 | 0.68 | 6.70 | 166.19 | 769.01  | 717.95 | 8.95  | 1.90 | 1054.35 | 0.68  | 3.82 | 0.18  | 13.25 |
|        | St. Dev. | 0.79  | 0.04 | 0.70   | 0.00 | 0.00 | 0.01 | 0.02 | 1.07   | 8.16    | 1.99   | 0.03  | 0.00 | 3.46    | 0.07  | 0.07 | 0.02  | 0.26  |
|        | Min      | 10.75 | 1.94 | 355.50 | 0.03 | 0.20 | 0.67 | 6.68 | 165.16 | 761.25  | 715.99 | 8.91  | 1.90 | 1051.66 | 0.60  | 3.79 | 0.16  | 13.03 |
|        | Max      | 12.25 | 2.01 | 356.89 | 0.03 | 0.20 | 0.69 | 6.73 | 167.30 | 777.52  | 719.97 | 8.98  | 1.90 | 1058.26 | 0.75  | 3.87 | 0.20  | 13.53 |
|        | Median   | 11.12 | 2.01 | 356.05 | 0.03 | 0.20 | 0.68 | 6.71 | 166.13 | 768.25  | 717.90 | 8.95  | 1.90 | 1053.14 | 0.68  | 3.81 | 0.18  | 13.20 |
|        | RSD      | 6.90  | 2.03 | 0.20   | 0.00 | 0.17 | 1.67 | 0.32 | 0.64   | 1.06    | 0.28   | 0.36  | 0.13 | 0.33    | 10.61 | 1.88 | 11.81 | 1.95  |
| S4     | Mean     | 15.51 | 2.63 | 437.46 | 0.13 | 0.30 | 0.29 | 7.41 | 155.55 | 1362.00 | 906.90 | 8.48  | 1.97 | 1407.68 | 0.28  | 5.17 | 1.24  | 18.76 |
|        | St. Dev. | 0.53  | 0.02 | 0.96   | 0.00 | 0.00 | 0.01 | 0.03 | 1.06   | 7.43    | 3.04   | 0.06  | 0.03 | 3.49    | 0.00  | 0.06 | 0.04  | 0.16  |
|        | Min      | 14.95 | 2.61 | 436.45 | 0.13 | 0.30 | 0.28 | 7.38 | 154.60 | 1355.11 | 903.84 | 8.41  | 1.95 | 1404.25 | 0.28  | 5.12 | 1.20  | 18.62 |
|        | Max      | 16.00 | 2.65 | 438.36 | 0.13 | 0.30 | 0.30 | 7.44 | 156.70 | 1369.88 | 909.92 | 8.52  | 2.00 | 1411.23 | 0.28  | 5.24 | 1.27  | 18.93 |
|        | Median   | 15.57 | 2.62 | 437.58 | 0.13 | 0.30 | 0.30 | 7.42 | 155.36 | 1361.02 | 906.93 | 8.49  | 1.95 | 1407.56 | 0.28  | 5.17 | 1.24  | 18.73 |
|        | RSD      | 3.39  | 0.66 | 0.22   | 1.57 | 0.08 | 3.44 | 0.34 | 0.68   | 0.55    | 0.34   | 0.68  | 1.32 | 0.25    | 0.00  | 1.15 | 2.85  | 0.84  |

Table S4. - Continued

| Sample |          | Al    | Ba   | Ca     | Cd   | Co   | Cr   | Cu    | Fe     | K       | Mg      | Mn    | Ni   | S       | Si    | Sr   | Ti   | Zn    |
|--------|----------|-------|------|--------|------|------|------|-------|--------|---------|---------|-------|------|---------|-------|------|------|-------|
| S5     | Mean     | 36.19 | 3.04 | 673.06 | 0.24 | 0.43 | 1.90 | 11.92 | 371.90 | 1703.01 | 1301.12 | 16.15 | 3.76 | 2121.48 | 1.23  | 6.55 | 1.52 | 25.03 |
|        | St. Dev. | 0.71  | 0.06 | 1.30   | 0.00 | 0.00 | 0.02 | 1.30  | 1.07   | 5.76    | 2.67    | 0.25  | 0.00 | 3.03    | 0.07  | 0.04 | 0.07 | 0.32  |
|        | Min      | 35.46 | 2.98 | 671.59 | 0.24 | 0.43 | 1.88 | 11.88 | 370.82 | 1698.33 | 1298.25 | 15.88 | 3.76 | 2118.15 | 1.17  | 6.51 | 1.45 | 24.71 |
|        | Max      | 36.88 | 3.11 | 674.07 | 0.24 | 0.43 | 1.92 | 11.94 | 372.95 | 1709.44 | 1303.53 | 16.38 | 3.77 | 2124.06 | 1.30  | 6.60 | 1.59 | 25.36 |
|        | Median   | 36.23 | 3.04 | 673.53 | 0.24 | 0.43 | 1.91 | 11.92 | 371.94 | 1701.25 | 1301.56 | 16.19 | 3.77 | 2122.24 | 1.23  | 6.55 | 1.52 | 25.02 |
|        | RSD      | 1.97  | 2.10 | 0.19   | 0.25 | 0.04 | 0.93 | 10.94 | 0.29   | 0.34    | 0.20    | 1.57  | 0.12 | 0.14    | 5.56  | 0.69 | 4.50 | 1.28  |
| S6     | Mean     | 25.10 | 3.72 | 908.06 | 0.04 | 0.35 | 1.19 | 10.82 | 157.05 | 1296.68 | 1105.20 | 16.16 | 3.37 | 1777.89 | 2.12  | 8.67 | 0.08 | 20.38 |
|        | St. Dev. | 0.34  | 0.01 | 1.42   | 0.00 | 0.00 | 0.01 | 0.03  | 1.27   | 5.03    | 2.48    | 0.36  | 0.01 | 4.04    | 0.09  | 0.05 | 0.00 | 0.44  |
|        | Min      | 24.77 | 3.70 | 906.46 | 0.04 | 0.35 | 1.19 | 10.78 | 155.99 | 1291.55 | 1102.45 | 15.79 | 3.36 | 1773.55 | 2.02  | 8.62 | 0.07 | 19.95 |
|        | Max      | 25.46 | 3.72 | 909.17 | 0.04 | 0.35 | 1.20 | 10.85 | 158.46 | 1301.61 | 1107.26 | 16.51 | 3.38 | 1781.55 | 2.19  | 8.72 | 0.08 | 20.83 |
|        | Median   | 25.05 | 3.72 | 908.55 | 0.04 | 3.72 | 1.20 | 10.82 | 156.70 | 1296.88 | 1105.90 | 16.17 | 3.38 | 1778.58 | 2.17  | 8.68 | 0.08 | 20.35 |
|        | RSD      | 1.37  | 0.34 | 0.16   | 5.79 | 0.27 | 0.62 | 0.29  | 0.81   | 0.39    | 0.22    | 2.23  | 0.37 | 0.23    | 4.44  | 0.60 | 5.88 | 2.16  |
| S7     | Mean     | 25.57 | 4.05 | 801.92 | 0.04 | 0.43 | 1.01 | 12.19 | 212.01 | 1635.88 | 1229.33 | 21.52 | 3.74 | 2150.00 | 0.58  | 8.39 | 1.16 | 22.17 |
|        | St. Dev. | 0.37  | 0.06 | 1.65   | 0.00 | 0.00 | 0.02 | 0.05  | 1.01   | 5.79    | 1.77    | 0.07  | 0.02 | 6.60    | 0.08  | 0.09 | 0.05 | 0.16  |
|        | Min      | 25.31 | 3.99 | 800.96 | 0.04 | 0.43 | 0.99 | 12.13 | 210.99 | 1630.25 | 1227.76 | 21.45 | 3.73 | 2145.55 | 0.49  | 8.33 | 1.11 | 22.01 |
|        | Max      | 26.00 | 4.10 | 803.83 | 0.04 | 0.43 | 1.03 | 12.24 | 213.00 | 1641.82 | 1231.25 | 21.59 | 3.77 | 2157.58 | 0.66  | 8.49 | 1.21 | 22.32 |
|        | Median   | 25.39 | 4.07 | 800.97 | 0.04 | 0.43 | 1.00 | 12.20 | 212.05 | 1635.58 | 1229.00 | 21.53 | 3.73 | 2146.87 | 0.59  | 8.35 | 1.15 | 22.17 |
|        | RSD      | 1.46  | 1.53 | 0.21   | 2.55 | 0.14 | 2.02 | 0.44  | 0.47   | 0.35    | 0.14    | 0.33  | 0.62 | 0.31    | 14.45 | 1.09 | 4.35 | 0.70  |
| S8     | Mean     | 17.05 | 3.78 | 601.65 | 0.25 | 0.34 | 0.86 | 10.44 | 183.85 | 1154.97 | 1085.83 | 10.52 | 2.13 | 1833.38 | 2.51  | 7.68 | 0.74 | 24.61 |
|        | St. Dev. | 0.17  | 0.03 | 1.06   | 0.00 | 0.00 | 0.02 | 0.03  | 0.91   | 4.87    | 2.61    | 0.07  | 0.02 | 3.87    | 0.08  | 0.10 | 0.05 | 0.22  |
|        | Min      | 16.89 | 3.74 | 600.65 | 0.25 | 0.34 | 0.84 | 10.40 | 182.89 | 1151.22 | 1082.88 | 10.47 | 2.10 | 1829.48 | 2.43  | 7.61 | 0.69 | 24.39 |
|        | Max      | 17.24 | 3.80 | 602.77 | 0.25 | 0.34 | 0.88 | 10.47 | 184.71 | 1160.47 | 1087.81 | 10.60 | 2.14 | 1837.21 | 2.60  | 7.80 | 0.79 | 24.83 |
|        | Median   | 17.03 | 3.80 | 601.55 | 0.25 | 0.34 | 0.85 | 10.45 | 183.95 | 1153.21 | 1086.80 | 10.50 | 2.14 | 1833.44 | 2.51  | 7.64 | 0.74 | 24.60 |
|        | RSD      | 1.02  | 0.84 | 0.18   | 0.44 | 0.14 | 1.98 | 0.31  | 0.50   | 0.42    | 0.24    | 0.64  | 0.92 | 0.21    | 3.31  | 1.29 | 6.69 | 0.90  |

Table S4. - Continued

| Sample |          | Al    | Ba   | Ca     | Cd   | Co   | Cr    | Cu    | Fe     | K       | Mg      | Mn    | Ni   | S       | Si   | Sr   | Ti    | Zn    |
|--------|----------|-------|------|--------|------|------|-------|-------|--------|---------|---------|-------|------|---------|------|------|-------|-------|
| S9     | Mean     | 15.03 | 2.52 | 500.00 | 0.20 | 0.25 | 0.07  | 7.19  | 56.90  | 952.28  | 850.18  | 6.90  | 1.62 | 1300.69 | 0.28 | 5.49 | 0.98  | 15.85 |
|        | St. Dev. | 0.11  | 0.01 | 1.09   | 0.00 | 0.00 | 0.01  | 0.03  | 0.01   | 6.25    | 2.98    | 0.06  | 0.01 | 2.86    | 0.00 | 0.07 | 0.07  | 0.15  |
|        | Min      | 14.90 | 2.51 | 498.90 | 0.20 | 0.25 | 0.07  | 7.16  | 56.89  | 945.52  | 847.20  | 6.85  | 1.61 | 1298.58 | 0.28 | 5.41 | 0.91  | 15.69 |
|        | Max      | 15.10 | 2.54 | 501.07 | 0.20 | 0.25 | 0.08  | 7.22  | 56.91  | 957.85  | 853.16  | 6.96  | 1.63 | 1303.94 | 0.28 | 5.56 | 1.05  | 15.99 |
|        | Median   | 15.08 | 2.52 | 500.05 | 0.20 | 0.25 | 0.08  | 7.19  | 56.90  | 953.47  | 850.19  | 6.89  | 1.61 | 1299.54 | 0.28 | 5.49 | 0.98  | 15.87 |
|        | RSD      | 0.74  | 0.48 | 0.22   | 0.28 | 0.31 | 10.91 | 0.47  | 0.01   | 0.66    | 0.35    | 0.85  | 0.83 | 0.22    | 0.00 | 1.35 | 7.31  | 0.94  |
| S10    | Mean     | 14.93 | 2.18 | 502.65 | 0.05 | 0.30 | 0.46  | 9.82  | 181.14 | 1222.70 | 1144.14 | 11.68 | 3.07 | 1805.69 | 0.28 | 5.93 | 0.32  | 20.45 |
|        | St. Dev. | 0.16  | 0.03 | 1.41   | 0.00 | 0.00 | 0.02  | 0.03  | 0.96   | 4.73    | 3.73    | 0.08  | 0.02 | 5.04    | 0.00 | 0.06 | 0.04  | 0.25  |
|        | Min      | 14.76 | 2.15 | 501.15 | 0.05 | 0.30 | 0.45  | 9.80  | 180.25 | 1218.23 | 1140.22 | 11.59 | 3.06 | 1801.55 | 0.28 | 5.88 | 0.28  | 20.20 |
|        | Max      | 15.06 | 2.20 | 503.95 | 0.05 | 0.30 | 0.48  | 9.85  | 182.15 | 1227.65 | 1147.66 | 11.76 | 3.09 | 1811.31 | 0.28 | 5.99 | 0.37  | 20.70 |
|        | Median   | 14.96 | 2.20 | 502.85 | 0.05 | 0.30 | 0.45  | 9.82  | 181.02 | 1222.22 | 1144.53 | 11.68 | 3.06 | 1804.22 | 0.28 | 5.92 | 0.33  | 20.45 |
|        | RSD      | 1.04  | 1.16 | 0.28   | 0.00 | 0.42 | 3.53  | 0.29  | 0.53   | 0.39    | 0.33    | 0.70  | 0.64 | 0.28    | 0.00 | 1.00 | 12.72 | 1.22  |
| S11    | Mean     | 24.60 | 3.94 | 584.13 | 0.30 | 0.56 | 0.43  | 11.27 | 188.64 | 1855.09 | 1200.81 | 12.34 | 3.78 | 1965.26 | 4.37 | 7.63 | 1.41  | 22.07 |
|        | St. Dev. | 0.37  | 0.01 | 1.01   | 0.01 | 0.00 | 0.01  | 0.27  | 0.76   | 5.81    | 3.13    | 0.02  | 0.01 | 7.42    | 0.08 | 0.07 | 0.05  | 0.25  |
|        | Min      | 24.26 | 3.92 | 583.15 | 0.29 | 0.56 | 0.42  | 11.03 | 187.92 | 1849.58 | 1198.16 | 12.32 | 3.77 | 1958.86 | 4.29 | 7.57 | 1.37  | 21.87 |
|        | Max      | 24.99 | 3.95 | 585.16 | 0.30 | 0.56 | 0.43  | 11.56 | 189.43 | 1861.15 | 1204.26 | 12.36 | 3.78 | 1973.39 | 4.44 | 7.71 | 1.46  | 22.35 |
|        | Median   | 24.55 | 3.93 | 584.07 | 0.30 | 0.56 | 0.43  | 11.21 | 188.56 | 1854.53 | 1200.00 | 12.35 | 3.77 | 1963.54 | 4.38 | 7.63 | 1.42  | 22.00 |
|        | RSD      | 1.50  | 0.35 | 0.17   | 1.92 | 0.13 | 1.19  | 2.40  | 0.40   | 0.31    | 0.26    | 0.19  | 0.15 | 0.38    | 1.80 | 0.90 | 3.29  | 1.14  |
| S12    | Mean     | 23.64 | 4.36 | 751.13 | 0.12 | 0.53 | 2.63  | 17.14 | 478.95 | 2962.35 | 1564.86 | 20.18 | 4.93 | 3010.16 | 5.71 | 8.76 | 1.64  | 34.57 |
|        | St. Dev. | 0.39  | 0.05 | 1.05   | 0.00 | 0.00 | 0.02  | 0.19  | 0.76   | 4.78    | 4.59    | 0.05  | 0.00 | 5.21    | 0.09 | 0.06 | 0.07  | 0.34  |
|        | Min      | 23.22 | 4.30 | 750.06 | 0.12 | 0.52 | 2.61  | 16.95 | 477.96 | 2958.09 | 1560.54 | 20.14 | 4.93 | 3004.66 | 5.62 | 8.70 | 1.59  | 34.23 |
|        | Max      | 24.00 | 4.40 | 752.15 | 0.12 | 0.53 | 2.65  | 17.33 | 480.03 | 2967.52 | 1569.68 | 20.24 | 4.93 | 3015.02 | 5.80 | 8.82 | 1.72  | 34.91 |
|        | Median   | 23.70 | 4.38 | 751.16 | 0.12 | 0.53 | 2.63  | 17.14 | 478.86 | 2961.43 | 1564.36 | 20.17 | 4.93 | 3010.81 | 5.72 | 8.76 | 1.63  | 34.56 |
|        | RSD      | 1.67  | 1.22 | 0.14   | 0.52 | 0.64 | 0.71  | 1.11  | 0.16   | 0.16    | 0.29    | 0.27  | 0.07 | 0.17    | 1.57 | 0.72 | 4.02  | 1.00  |

**Table S5.** Present study Vs. literature data for elemental composition of dark chocolate

| Reference | Present study  | [6]         | [25]                            | [27]                   | [28]          | [29]        | [26‡,65&]              | [30]          | [31]          | [32]                 |
|-----------|----------------|-------------|---------------------------------|------------------------|---------------|-------------|------------------------|---------------|---------------|----------------------|
| *         | ICP-OES        | ICP-MS      | ICP OES and ICP-MS <sup>§</sup> |                        | ICP-OES       |             |                        | ICP-OES       | ICP-OES       | MIP-OES <sup>‡</sup> |
| **        | 43-99%         | 53-85%      | 50-70%                          | 55-85%                 | 60-90%        | 70-75%      | ‡- 44-90%<br>& 50-100% | 70-85%        | 40-90%        | 55-85%               |
| <b>Al</b> | 11.38-36.19    |             | 9.9-30.1                        |                        | 5.6-13.8      | 7.2-112     |                        |               | 5.4-69        |                      |
| <b>Ba</b> | 1.69-4.36      |             | 4.25-8.99                       |                        | 5.4-8.0       | 2.90-6.85   |                        |               | 2.03-6.28     |                      |
| <b>Ca</b> | 337.69-908.12  |             | 449-1421                        | 578–1157               | 643.3-908.3   | 118-884     |                        | 533.3-1027.4  | 319.9- 1318.9 | 653-903              |
| <b>Cd</b> | 0.03-0.3       |             | 0.043-0.510                     |                        |               | 0.022-0.178 | 0.004-3.15&            |               |               |                      |
| <b>Co</b> | 0.19-0.56      |             | 0.286-0.668                     |                        | 0.33-0.58     | 0.047-0.457 |                        |               |               |                      |
| <b>Cr</b> | 0.07-2.63      | 0.48 - 2.91 | 0.41-2.27                       |                        |               | 0.23-1.69   |                        | 0.1-0.2       |               | 0.003-2.8            |
| <b>Cu</b> | 6.70-17.14     |             | 8.5-26.7                        | 7.6–13.6 <sup>§</sup>  | 14.3-20.2     | 9.5-16.2    | 5.05-16.5‡             | 7.5-8.5       | 21.5-39.5     | 7.6-19.5             |
| <b>Fe</b> | 56.9-478.95    |             | 45.7-162                        |                        | 97.3-112.4    | 37.8-179    |                        | 28.9-33.1     | 99.41 – 331.7 | 57-227               |
| <b>K</b>  | 695.3-2962.1   |             |                                 | 4613–7006              | 4655.5-7201.1 | 4950-12700  |                        | 3651.1-4209.9 | 381.9-1082.7  | 4885-8574            |
| <b>Mg</b> | 663.48-1564.86 |             | 1104-2383                       | 1268–1910              | 1587.8-2522.1 | 855-1590    |                        | 1416.7-1993.9 | 1348.4- 3622  | 1083-2775            |
| <b>Mn</b> | 6.9 - 21.52    |             | 10.2-21.5                       | 9.7–14.7 <sup>§</sup>  | 16.5-20.5     | 7.90-16.2   |                        | 7.7-11.1      | 14.5-15.5     | 9.6-25.2             |
| <b>Ni</b> | 1.62-4.93      |             | 2.57-7.93                       |                        | 3.6-6.1       | 2.29-5.90   |                        |               | 4.5-9.2       | 5.0-9.0              |
| <b>S</b>  | 1053.6-3009.7  |             | 669-1443                        |                        |               |             |                        |               | 417.77-639.52 |                      |
| <b>Si</b> | 0.28- 5.7      |             | 27-100                          |                        |               | 8.2-219     |                        |               |               |                      |
| <b>Sr</b> | 3.70- 8.76     |             | 5.74-7.81                       |                        | 0.04-0.08     | 4.20-7.90   |                        |               | 5.5-6.2       |                      |
| <b>Ti</b> | 0.08-1.64      |             | 0.002-0.006                     |                        |               |             |                        |               |               |                      |
| <b>Zn</b> | 12.15-34.6     |             | 18.5-41.5                       | 38.4–64.8 <sup>§</sup> | 22.4-35.2     | 16.3-28.9   |                        | 17.7-20.5     | 16.86-39.26   | 20.4-33              |

Concentrations are expressed as mg/kg

\*Methods; Inductively coupled plasma optical emission spectrometry (ICP-OES); Inductively coupled plasma mass spectrometry (ICP-MS); Microwave-induced plasma optical emission spectrometry (MIP-OES)

\*\*Cocoa percentage

Table S6. Parameters of post-hoc Fisher test - LSD

| Cd  | S1     | S2     | S3     | S4     | S5     | S6     | S7     | S8     | S9     | S10    | S11    | S12    |
|-----|--------|--------|--------|--------|--------|--------|--------|--------|--------|--------|--------|--------|
| S1  | 0.0000 | 0.0000 | 0.0000 | 0.0984 | 0.2052 | 0.0059 | 0.0041 | 0.2148 | 0.1643 | 0.0140 | 0.2681 | 0.0912 |
| S2  | 0.0000 | 0.0000 | 0.0000 | 0.0984 | 0.2052 | 0.0059 | 0.0041 | 0.2148 | 0.1643 | 0.0140 | 0.2681 | 0.0912 |
| S3  | 0.0000 | 0.0000 | 0.0000 | 0.0984 | 0.2052 | 0.0059 | 0.0041 | 0.2148 | 0.1643 | 0.0140 | 0.2681 | 0.0912 |
| S4  | 0.0984 | 0.0984 | 0.0984 | 0.0000 | 0.1067 | 0.0926 | 0.0943 | 0.1163 | 0.0659 | 0.0844 | 0.1696 | 0.0073 |
| S5  | 0.2052 | 0.2052 | 0.2052 | 0.1067 | 0.0000 | 0.1993 | 0.2011 | 0.0096 | 0.0408 | 0.1912 | 0.0629 | 0.1140 |
| S6  | 0.0059 | 0.0059 | 0.0059 | 0.0926 | 0.1993 | 0.0000 | 0.0018 | 0.2089 | 0.1585 | 0.0081 | 0.2622 | 0.0853 |
| S7  | 0.0041 | 0.0041 | 0.0041 | 0.0943 | 0.2011 | 0.0018 | 0.0000 | 0.2107 | 0.1602 | 0.0099 | 0.2640 | 0.0871 |
| S8  | 0.2148 | 0.2148 | 0.2148 | 0.1163 | 0.0096 | 0.2089 | 0.2107 | 0.0000 | 0.0504 | 0.2008 | 0.0533 | 0.1236 |
| S9  | 0.1643 | 0.1643 | 0.1643 | 0.0659 | 0.0408 | 0.1585 | 0.1602 | 0.0504 | 0.0000 | 0.1503 | 0.1037 | 0.0732 |
| S10 | 0.0140 | 0.0140 | 0.0140 | 0.0844 | 0.1912 | 0.0081 | 0.0099 | 0.2008 | 0.1503 | 0.0000 | 0.2541 | 0.0772 |
| S11 | 0.2681 | 0.2681 | 0.2681 | 0.1696 | 0.0629 | 0.2622 | 0.2640 | 0.0533 | 0.1037 | 0.2541 | 0.0000 | 0.1769 |
| S12 | 0.0912 | 0.0912 | 0.0912 | 0.0073 | 0.1140 | 0.0853 | 0.0871 | 0.1236 | 0.0732 | 0.0772 | 0.1769 | 0.0000 |

\*LSD 0.0033

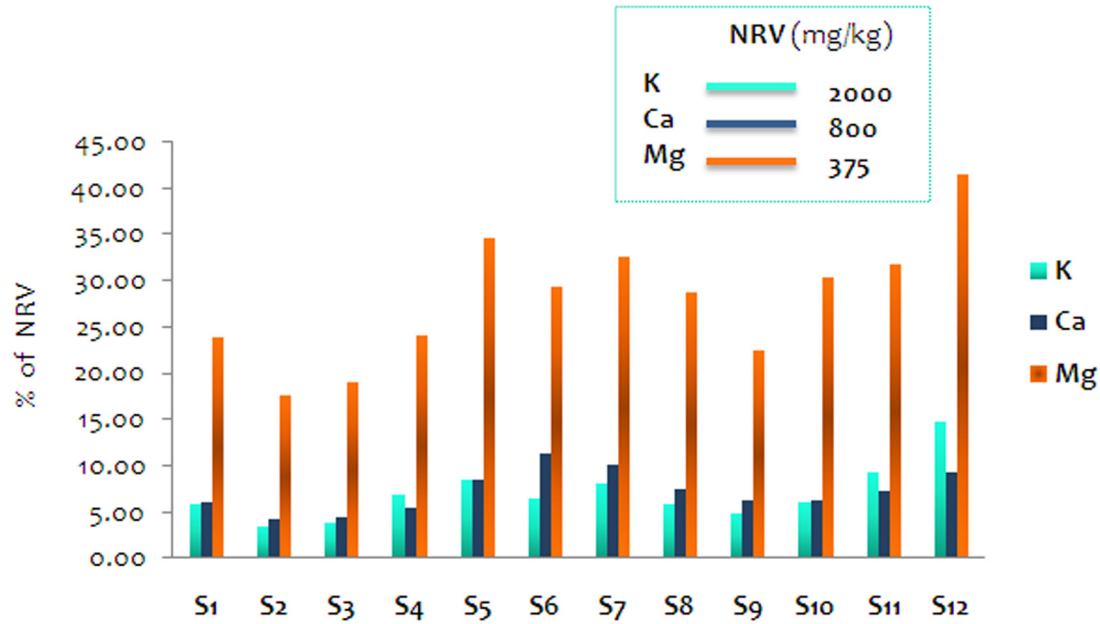

Figure S1. Percentage of K, Ca and Mg dietary intake from 100 g of dark chocolate compared with nutritional reference values (NRV) (\*NRV according to ref. [45])

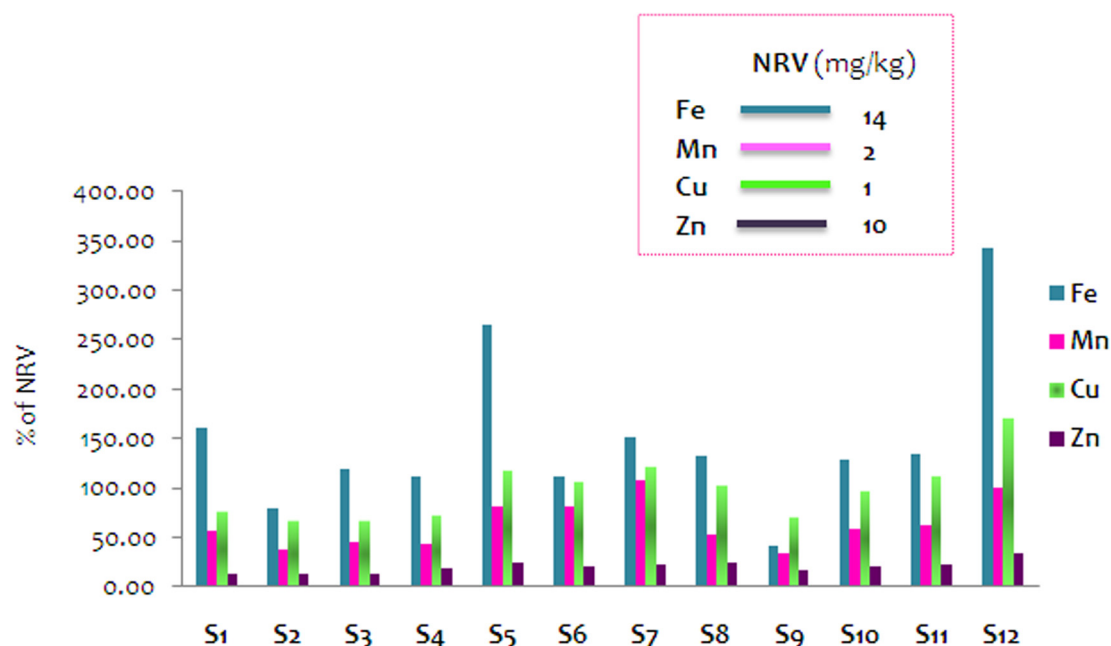

**Figure S2.** Percentage of Fe, Mn, Cu and Zn dietary intake from 100 g of dark chocolate compared with nutritional reference values (NRV)\*  
(\*NRV according to ref. [45])

## References

- [6] Yanus, R.L.; Sela, H.; Borojovich, E.J.C.; Zakon, Y.; Saphier, M.; Nikolski, A.; Gutflais, E.; Lorber, A.; Karpas, Z. Trace elements in cocoa solids and chocolate: An ICPMS study. *Talanta* **2014**, *119*, 1–4.
- [25] Sager, M. Chocolate and cocoa products as a source of essential elements in nutrition. *J. Nutr. Food Sci.* **2012**, *2*, 123.
- [26] Weber, T.; Solioz, M. Evaluation of chocolate as a source of dietary copper. *Eur. Food Res. Technol.* **2014**, *238*, 1063–1066.
- [27] Villa, J.E.L.; Pereira, C.D.; Cadore, S. A novel, rapid and simple acid extraction for multielemental determination in chocolate bars. *Microchem. J.* **2015**, *121*, 199–204.
- [28] Cinquanta, L.; Di Cesare, C.; Manoni, R.; Piano, A.; Roberti, P.; Salvatori, G. Mineral essential elements for nutrition in different chocolate products. *Int. J. Food Sci. Nutr.* **2016**, *67*, 773–778.
- [29] Mrmošanin, M.J.; Pavlović, N.A.; Krstić, N.J.; Mitić, S.S.; Tošić, B.S.; Stojković, B.M.; Micić, J.R.; Đorđević, S.M. Multielemental quantification in dark chocolate by ICP OES. *J. Food Compos. Anal.* **2018**, *67*, 163–171.
- [30] Grassia, M.; Salvatori, G.; Roberti, M.; Planeta, D.; Cinquanta, L. Polyphenols, methylxanthines, fatty acids and minerals in cocoa beans and cocoa products. *Food Measure.* **2019**, *13*, 1721–1728.
- [31] Karaş, K.; Ziola-Frankowska, A.; Bartoszewicz, M.; Krzyśko, G.; Frankowski, M. Investigation of chocolate types on the content of selected metals and non-metals determined by ICP-OES analytical technique, *Food Addit. Contam. Part A*, **2021**, *38*, 293–303. DOI: 10.1080/19440049.2020.1853821
- [32] Oliveira, L.B.; de Melo, J.C.; da Boa Morte, E.S.; de Jesus, R.M.; Teixeira, L.S.G.; Korn, G.A.M., Multi-element determination in chocolate bars by microwave-induced plasma optical emission spectrometry, *Food Chem.* **2021**, *351*, 129285. <https://doi.org/10.1016/j.foodchem.2021.129285>.



- [45] Pravilnik o deklarisanju, označavanju i reklamiranju hrane ("Regulation on labelling and advertising of food") ("Official Gazette RS". No. 19/2017 and 16/2018) (in Serbian); <http://demo.paragraf.rs/WebParagrafDemo/?did=424789>. Accessed on 20 January 2022
- [65] Abt, E.; Fong Sam, J.; Gray, P.; Posnick Robin, L. Cadmium and lead in cocoa powder and chocolate products in the US Market. *Food Addit. Contam.: B Surveill.* **2018**, *11*, 92–102. doi: 10.1080/19393210.2017.1420700
